# Supplementary figures and images for: Identification of The Prognostic Genes For Early Basal-Like Breast Cancer With Weighted Gene Co-Expression Network Analysis
Source: Research Square preprint supplement (doi:10.21203/rs.3.rs-1110962/v1), 2021-11-30

**Suppl Figure 1. The protein-protein internetwork of the intersected genes.**

**
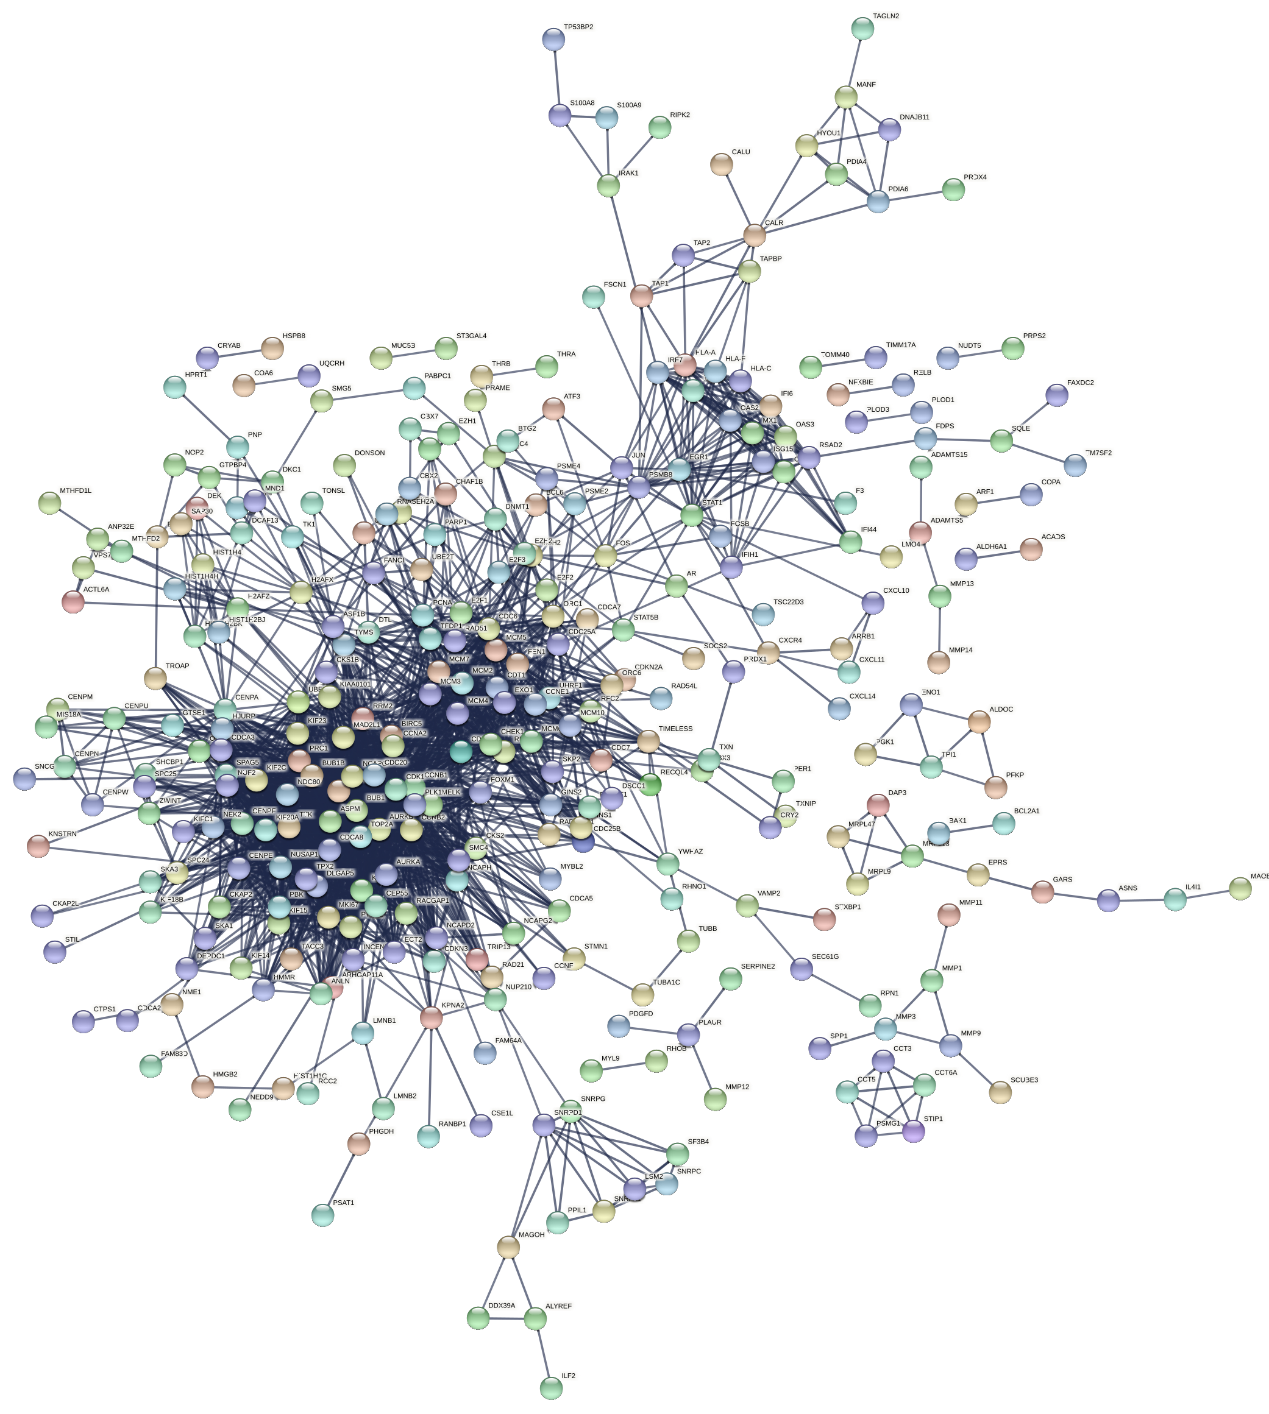
**

Supplement: Supplementary file 1 [file fa483c423e9815d7f5be7b7c.docx]
